# Supplementary material for: Direct calculation of1H2O T1NMRD profiles and EPR lineshapes for the electron spin quantum numbers S = 1, 3/2, 2, 5/2, 3, 7/2, based on the stochastic Liouville equation combined with Brownian dynamics simulation
Source: Royal Society of Chemistry journal article supplement (doi:10.1039/b614821b), 2007-01-01
Supplement: addcorr_pccp_b614821b.doc [file addcorr_pccp_b614821b.doc]

——————————————————————————————————

**Additions and corrections**

**Direct calculation of 1H2O *T*1 NMRD profiles and EPR lineshapes for the electron spin quantum numbers *S* = 1, 3/2, 2, 5/2, 3, 7/2, based on the stochastic Liouville equation combined with Brownian dynamics simulation**

Ken Åman and Per-Olof Westlund

*Phys. Chem. Chem. Phys.*, 2007, **9**, 691–700, (DOI: 10.1039/b614821b). ***Amendment published 4th July 2007***

## Table 2 and 3 are not referring to the correct figures in the published paper. The first column in Table 2 referring to Figures 2, 3A, 3B, 4A, 4B; should instead read: 4, 5a, 5b, 6a, 6b. The first column in Table 3 referring to Figures: 5, 6A, 6B; should read: 7, 8a, 8b. Also, line 22 in the right column on page 696 should be corrected to: “used by Rast and coworkers5) and in 5b and 6b, *τ*R = 1 ns.” The reference to the bath trace in eqn (14) in the text at the bottom of the right column on page 694 should instead be a reference to eqn (11). A minor error is found in the figure caption of Fig. 5; one of the Δt should of course be Δs. Finally, we can also correct a misprint at page 699 for submatrix *M*3. At the bottom of the left column on page 699 we have written out numerical values for *γi*, where *i =* 1, 2 and 3, but of course it should instead be *µi* in order for the presentation to make sense.

The Royal Society of Chemistry apologises for these errors and any consequent inconvenience to authors and readers.

**Additions and corrections can be viewed online by accessing the original article to which they apply.**
